# Supplementary material for: The effect of a novel catalytic system with Savinase 16L and an organophosphine compound on the shrink-proofing and dyeing properties of wool
Source: Royal Society of Chemistry journal article supplement (doi:10.1039/d3nj03298a), 2023-01-01
Supplement: d3nj03298a1.pdf [file d3nj03298a1.pdf]

Electronic Supplementary Information (ESI) for New  
Journal of Chemistry

**Effect of a novel catalytic system with Savinase 16L and organophosphine compound on shrink-proofing and dyeing properties of wool**

Le Wang,<sup>\*abc</sup> Zhixin Duan,<sup>d</sup> Jinbo Yao<sup>\*c</sup>, Liyan Liu<sup>c</sup>, Pengfei Fei<sup>a</sup>, Zhifeng Yan<sup>a</sup>, Youbo Di<sup>a</sup>, Hua Wang<sup>a</sup> and Jianjun Lu<sup>a</sup>

<sup>a</sup> College of Textile Engineering, Taiyuan University of Technology, Taiyuan 030600, China. Email: wangle9106@163.com

<sup>b</sup> College of Materials Science and Engineering, Taiyuan University of Technology, Taiyuan 030024, China

<sup>c</sup> Jiangsu Sunshine Group, Wuxi 214426, China

<sup>d</sup> State Key Laboratory of Clean and Efficient Coal Utilization, Taiyuan University of Technology, Taiyuan 030024, China

<sup>e</sup> School of Textile Science and Engineering, Tiangong University, Tianjin 300387, China. Email: yao-yaojinbo@tiangong.edu.cn

## **Table of Contents**

1. Supplemental Figure
2. Supplemental Tables

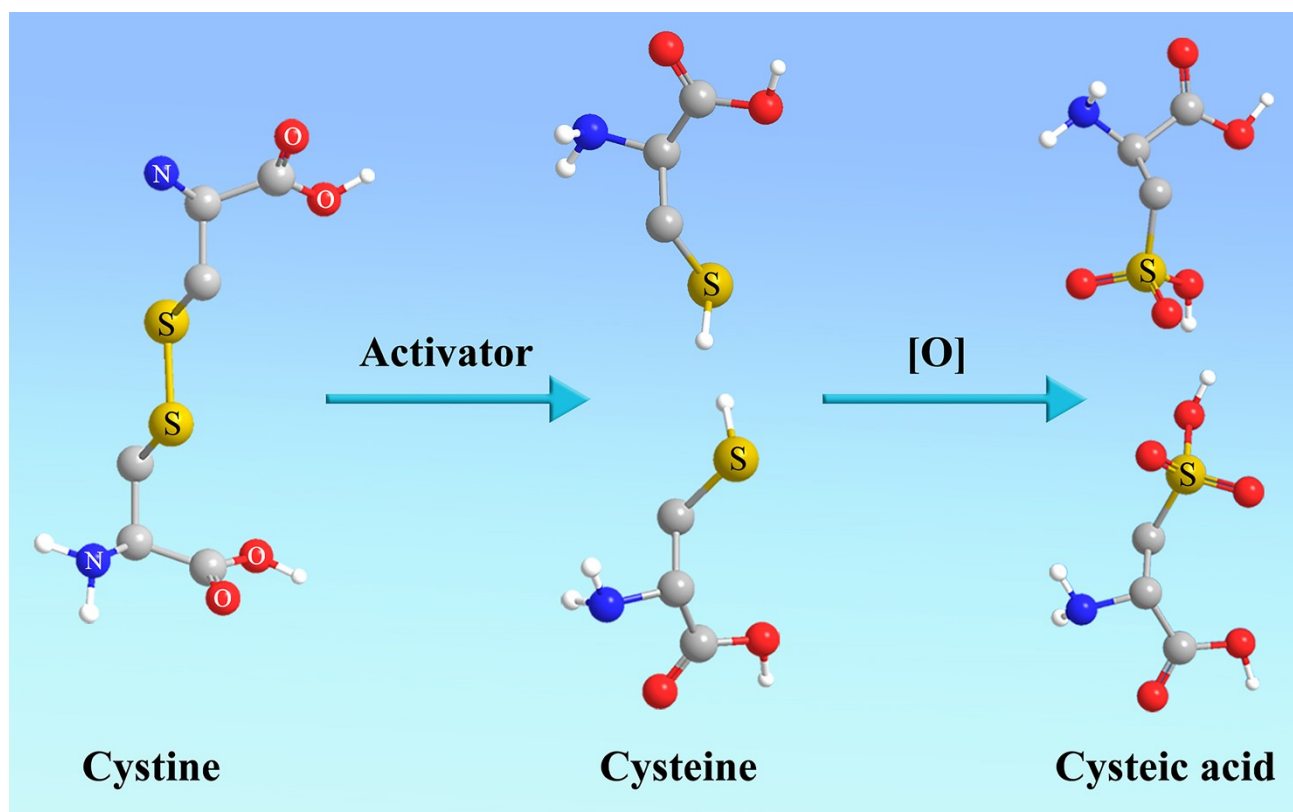

Fig. S1 The reaction process of cystine in wool fiber during the treatment of protease catalytic system.

**Table S1** Machine washable performance of treated wool

| Washing program |      | Size (cm) |        | Shrinkage percentage (%) |        |             |
|-----------------|------|-----------|--------|--------------------------|--------|-------------|
|                 |      | Width     | Length | Width                    | Length | Felted area |
| Original        |      | 29.70     | 39.80  | /                        | /      | /           |
| Relaxed         | 1×4G | 28.60     | 39.10  | -3.59                    | -1.68  | /           |
|                 | 1×4N | 29.50     | 38.40  | 3.30                     | -1.87  | 1.10        |
|                 | 2×4N | 28.70     | 38.80  | 0.35                     | -0.94  | -0.59       |
| felted          | 3×4N | 28.90     | 38.30  | 1.05                     | -2.21  | -1.19       |
|                 | 4×4N | 28.80     | 38.40  | 0.70                     | -1.79  | -1.10       |
|                 | 5×4N | 28.50     | 38.70  | -0.47                    | -1.19  | -1.65       |

**Table S2** Comparison of protease catalytic system processes with existing processes

|                        |                                | Wool shrink-proofing treatment |                                 |           |
|------------------------|--------------------------------|--------------------------------|---------------------------------|-----------|
|                        |                                | Conventional chlorination      | Existing other enzyme treatment | This work |
| <b>Processes</b>       | Efficient                      | ☞                              | ☞                               | ☞         |
|                        | Mild conditions                | ☞                              | ☞                               | ☞         |
|                        | Easy operation                 | ☞                              | ☞                               | ☞         |
|                        | Continuous processing          | ☞                              | ☞                               | ☞         |
| <b>Wool properties</b> | Excellent shrinkage resistance | ☞                              | ☞                               | ☞         |
|                        | Mild damage                    | ☞                              | ☹                               | ☹         |
|                        | <b>Industrialized</b>          | ☞                              | ☞                               | ☞         |
|                        | <b>Eco-friendly</b>            | ☞                              | ☞                               | ☞         |

Note: ☞, ☹, and ☞ stands for good, fair, and poor, respectively.

**Table S3** Colorfastness

| <b>Colorfastness</b>     |                 | <b>Untreated + Dyed</b> | <b>Treated + Dyed</b> |
|--------------------------|-----------------|-------------------------|-----------------------|
| <b>Washing with soda</b> | Color change    | 4-5                     | 4-5                   |
|                          | Wool staining   | 4-5                     | 4-5                   |
|                          | Cotton staining | 4-5                     | 4-5                   |
| <b>Perspiration</b>      | Color change    | 4-5                     | 4-5                   |
|                          | Wool staining   | 4-5                     | 4-5                   |
|                          | Cotton staining | 4-5                     | 4-5                   |
| <b>Water</b>             | Color change    | 4-5                     | 4-5                   |
|                          | Wool staining   | 4-5                     | 4-5                   |
|                          | Cotton staining | 4-5                     | 4-5                   |
| <b>Ironing</b>           | Color change    | 4-5                     | 4-5                   |
|                          | Cotton staining | 4-5                     | 4-5                   |
| <b>Rubbing</b>           | Dry             | 4-5                     | 4-5                   |
|                          | Wet             | 4                       | 4                     |
